# Supplementary material for: Identification, Screening, and Comprehensive Evaluation of Novel DPP-IV Inhibitory Peptides from the Tilapia Skin Gelatin Hydrolysate Produced Using Ginger Protease
Source: MDPI journal article supplement (doi:10.3390/biom12121866), 2022-12-13
Supplement: s1 [file s1]

Table S1 Peptides from the GPH identified by nano LC-MS/MS

| No. | Peptide sequence | ALC | Mass/Da   | length | tr    | PTM                  |
|-----|------------------|-----|-----------|--------|-------|----------------------|
| 1   | FXGFM            | 96  | 613.2521  | 5      | 46.23 | Pro->Hyp             |
| 2   | FXGPF            | 96  | 579.2643  | 5      | 41.44 | Pro->Hyp             |
| 3   | WFXGPR           | 97  | 774.3763  | 6      | 13.55 | Pro->Hyp             |
| 4   | FXGMY            | 97  | 629.247   | 5      | 34.32 | Pro->Hyp             |
| 5   | LXGFM            | 99  | 579.2678  | 5      | 40.22 | Pro->Hyp             |
| 6   | GPLF             | 97  | 432.2372  | 4      | 34.93 |                      |
| 7   | LXGPF            | 99  | 545.28    | 5      | 34.29 | Pro->Hyp             |
| 8   | LPGPF            | 97  | 529.29    | 5      | 41.31 |                      |
| 9   | FXGFQ            | 97  | 610.2701  | 5      | 33.49 | Pro->Hyp             |
| 10  | LGPF             | 95  | 432.2372  | 4      | 37.6  |                      |
| 11  | FXGPR            | 99  | 588.2971  | 5      | 11.16 | Pro->Hyp             |
| 12  | FXGGLM           | 96  | 636.2892  | 6      | 38.19 | Pro->Hyp             |
| 13  | LXGPLF           | 99  | 658.3641  | 6      | 44.96 | Pro->Hyp             |
| 14  | GFXGPR           | 97  | 645.3185  | 6      | 11.97 | Pro->Hyp             |
| 15  | FFXGPK           | 95  | 707.3593  | 6      | 17.38 | Pro->Hyp             |
| 16  | GPXGPGXGMP       | 97  | 894.3807  | 10     | 18.2  | Pro->Hyp             |
| 17  | SGPLF            | 95  | 519.2693  | 5      | 37.19 |                      |
| 18  | GFXGFQ           | 96  | 667.2916  | 6      | 36.35 | Pro->Hyp             |
| 19  | GPXGPXGGPR       | 98  | 919.4413  | 10     | 8.53  | Pro->Hyp             |
| 20  | FXGAP            | 96  | 503.233   | 5      | 16.05 | Pro->Hyp             |
| 21  | GPXGPXGPGP       | 99  | 860.3929  | 10     | 13.76 | Pro->Hyp             |
| 22  | GPXGPPGPGP       | 99  | 844.403   | 10     | 16.19 | Pro->Hyp             |
| 23  | GPPGPPGPGP       | 99  | 828.413   | 10     | 18.68 |                      |
| 24  | GPXGPXGPGX       | 97  | 876.3829  | 10     | 11.35 | Pro->Hyp             |
| 25  | GPPGPGPGP        | 95  | 844.403   | 10     | 15.15 | Pro->Hyp             |
| 26  | AFXGPR           | 95  | 659.3342  | 6      | 11.68 | Pro->Hyp             |
| 27  | GPXGPXGGRP       | 95  | 919.4413  | 10     | 8.56  | Pro->Hyp             |
| 28  | APDPF            | 97  | 545.2485  | 5      | 29.79 |                      |
| 29  | AGFXGPR          | 98  | 716.3556  | 7      | 13.01 | Pro->Hyp             |
| 30  | FXGLR            | 97  | 604.3284  | 5      | 21.32 | Pro->Hyp             |
| 31  | AGGFXGPR         | 97  | 773.3771  | 8      | 13.46 | Pro->Hyp             |
| 32  | GPXGPHFXKGP      | 95  | 1118.541  | 11     | 9.83  | Pro->Hyp             |
| 33  | GPXGGPXGPXGPGP   | 96  | 1184.5315 | 14     | 16.37 | Pro->Hyp             |
| 34  | SGFXGPR          | 97  | 732.3505  | 7      | 12.91 | Pro->Hyp             |
| 35  | W(+42.01)VPGPM   | 96  | 727.3363  | 6      | 35.62 | Acetylation (N-term) |
| 36  | LXGFXGPR         | 96  | 871.4453  | 8      | 25.74 | Pro->Hyp             |
| 37  | GPXGPGXGPGXGAP   | 98  | 1158.5156 | 14     | 14.73 | Pro->Hyp             |
| 38  | LPFR             | 95  | 531.3169  | 4      | 19.19 |                      |
| 39  | PGPGMP           | 98  | 554.2523  | 6      | 16.39 |                      |
| 40  | FXGPA            | 98  | 503.233   | 5      | 17.11 | Pro->Hyp             |
| 41  | FGXGPR           | 99  | 645.3185  | 6      | 11.48 | Pro->Hyp             |
| 42  | GPXGGPXGPPG      | 98  | 917.4144  | 11     | 12.94 | Pro->Hyp             |
| 43  | GPXGGPXGPXG      | 96  | 933.4044  | 11     | 10.97 | Pro->Hyp             |
| 44  | AGPXGPXGPGP      | 96  | 931.4301  | 11     | 14.47 | Pro->Hyp             |
| 45  | GPLFR            | 97  | 588.3383  | 5      | 18.09 |                      |

|    |                  |    |           |    |       |                                   |
|----|------------------|----|-----------|----|-------|-----------------------------------|
| 46 | GPXGPPG          | 96 | 593.2759  | 7  | 9.72  | Pro->Hyp                          |
| 47 | APDPFR           | 98 | 701.3496  | 6  | 20.1  |                                   |
| 48 | GPPVPGPLGP       | 98 | 886.4912  | 10 | 35    |                                   |
| 49 | FXGGLR           | 96 | 661.3498  | 6  | 17.12 | Pro->Hyp                          |
| 50 | GPXGPXGLGXGAP    | 96 | 1117.5256 | 13 | 22.57 | Pro->Hyp                          |
| 51 | AXGFXGPK         | 98 | 801.3922  | 8  | 13.6  | Pro->Hyp                          |
| 52 | GPXGPXGPGXGAP    | 99 | 1101.4944 | 13 | 15.38 | Pro->Hyp                          |
| 53 | APDPGPGMP        | 97 | 837.3691  | 9  | 20.93 |                                   |
| 54 | GPXGPXGGPSPXG    | 95 | 1117.4893 | 13 | 13.31 | Pro->Hyp                          |
| 55 | GAPDPGPGMP       | 97 | 894.3905  | 10 | 22.9  |                                   |
| 56 | AAFXGPR          | 98 | 730.3713  | 7  | 12.9  | Pro->Hyp                          |
| 57 | GPXGPXGGKP       | 95 | 891.4351  | 10 | 8.03  | Pro->Hyp                          |
| 58 | GPXGPXGGRVGPXGAP | 96 | 1413.6853 | 16 | 16.1  | Pro->Hyp                          |
| 59 | GPXGPGXGAGP      | 96 | 891.3987  | 11 | 11.52 | Pro->Hyp                          |
| 60 | GPXGLXGPXGPA     | 96 | 1060.5042 | 12 | 24.62 | Pro->Hyp                          |
| 61 | VPGLF            | 98 | 628.3584  | 6  | 44.37 |                                   |
| 62 | XPGPPGP          | 97 | 633.3073  | 7  | 25.2  | Pro->Hyp                          |
| 63 | GPXGPXGRXGAP     | 96 | 1103.5212 | 12 | 10.17 | Pro->Hyp                          |
| 64 | GPXGPXGPA        | 98 | 777.3558  | 9  | 11.45 | Pro->Hyp                          |
| 65 | GPXGPPGPA        | 97 | 761.3658  | 9  | 13.91 | Pro->Hyp                          |
| 66 | LFXGPR           | 98 | 701.3811  | 6  | 16.19 | Pro->Hyp                          |
| 67 | GPXGGPXGPXGAP    | 98 | 1101.4944 | 13 | 14.85 | Pro->Hyp                          |
| 68 | GPXGLXGPGA       | 95 | 850.4086  | 10 | 18.36 | Pro->Hyp                          |
| 69 | GPXGGGPXPGXGAP   | 95 | 1158.5156 | 14 | 13.16 | Pro->Hyp                          |
| 70 | FXGPK            | 98 | 560.2909  | 5  | 10.29 | Pro->Hyp                          |
| 71 | FXGAR            | 97 | 562.2814  | 5  | 9.11  | Pro->Hyp                          |
| 72 | GPXGFGXGAP       | 98 | 884.3929  | 10 | 23    | Pro->Hyp                          |
| 73 | GFXGPK           | 98 | 617.3124  | 6  | 11.08 | Pro->Hyp                          |
| 74 | NPXGPXGPPG       | 96 | 917.4144  | 10 | 14.07 | Pro->Hyp                          |
| 75 | PGPL             | 97 | 382.2216  | 4  | 34.87 |                                   |
| 76 | A(+42.01)XGPPGP  | 97 | 649.3022  | 7  | 21    | Acetylation (N-term);<br>Pro->Hyp |
| 77 | AAPDPGPGMP       | 97 | 908.4062  | 10 | 22.73 |                                   |
| 78 | AXGPVF           | 99 | 602.3015  | 6  | 29.55 | Pro->Hyp                          |
| 79 | W(+42.01)VPGP    | 97 | 596.2958  | 5  | 25.9  | Acetylation (N-term)              |
| 80 | FXGGPXGPT        | 95 | 857.3821  | 9  | 21.77 | Pro->Hyp                          |
| 81 | VGFM             | 95 | 452.2094  | 4  | 33.84 |                                   |
| 82 | N(+.98)PGPGMP    | 95 | 669.2792  | 7  | 19.49 | Deamidation (NQ)                  |
| 83 | AGFXGPK          | 97 | 688.3495  | 7  | 12.03 | Pro->Hyp                          |
| 84 | GPXGPGP          | 98 | 593.2759  | 7  | 9.74  | Pro->Hyp                          |
| 85 | GPXGPYGPXGAP     | 97 | 1094.4934 | 12 | 29.01 | Pro->Hyp                          |
| 86 | GPXGLXGPT        | 96 | 823.3977  | 9  | 20.04 | Pro->Hyp                          |
| 87 | LXGGPXGPXGAP     | 96 | 1060.5042 | 12 | 20.21 | Pro->Hyp                          |
| 88 | GPXGPXGGAXGAP    | 98 | 1075.4785 | 13 | 12.59 | Pro->Hyp                          |
| 89 | LXGPLL           | 97 | 624.3797  | 6  | 38.51 | Pro->Hyp                          |
| 90 | GPVF             | 98 | 418.2216  | 4  | 27.58 |                                   |
| 91 | PGGPLP           | 95 | 536.2958  | 6  | 35.54 |                                   |

|     |                 |    |           |    |       |                                   |
|-----|-----------------|----|-----------|----|-------|-----------------------------------|
| 92  | LXGPL           | 99 | 511.2957  | 5  | 23.75 | Pro->Hyp                          |
| 93  | LPGPL           | 99 | 495.3057  | 5  | 29.17 |                                   |
| 94  | GPXGPXGXGPGPS   | 95 | 1117.4893 | 13 | 13.83 | Pro->Hyp                          |
| 95  | FXGGAP          | 97 | 560.2545  | 6  | 16.21 | Pro->Hyp                          |
| 96  | GPXGPXGAP       | 98 | 777.3558  | 9  | 10.94 | Pro->Hyp                          |
| 97  | GPXGPPGAP       | 98 | 761.3658  | 9  | 14.35 | Pro->Hyp                          |
| 98  | GPXGGLXGPT      | 96 | 880.4192  | 10 | 17.61 | Pro->Hyp                          |
| 99  | FXGLA           | 98 | 519.2643  | 5  | 31.72 | Pro->Hyp                          |
| 100 | GPXGPGXGAP      | 99 | 834.3773  | 10 | 11.61 | Pro->Hyp                          |
| 101 | GPPGPGXGAP      | 98 | 818.3873  | 10 | 13.5  | Pro->Hyp                          |
| 102 | LN(+.98)FXGPR   | 95 | 816.408   | 7  | 25.18 | Deamidation (NQ);<br>Pro->Hyp     |
| 103 | FGXGAP          | 95 | 560.2545  | 6  | 18.31 | Pro->Hyp                          |
| 104 | GPXGFGXPQ       | 96 | 884.3929  | 9  | 22.47 | Pro->Hyp                          |
| 105 | AGGPXGPXGAP     | 99 | 905.4144  | 11 | 12.78 | Pro->Hyp                          |
| 106 | GPXGPXGGVP      | 96 | 862.4086  | 10 | 16.82 | Pro->Hyp                          |
| 107 | GHRGF           | 95 | 572.2819  | 5  | 7.43  |                                   |
| 108 | AGPXGPXGAP      | 99 | 848.3929  | 10 | 13.11 | Pro->Hyp                          |
| 109 | GPPVPGPLK       | 95 | 860.512   | 9  | 21.24 |                                   |
| 110 | XGPR            | 99 | 441.2286  | 4  | 10.91 | Pro->Hyp                          |
| 111 | QGGGPXGPXGAP    | 97 | 1019.4573 | 12 | 12.33 | Pro->Hyp                          |
| 112 | A(+42.01)XGPLR  | 97 | 667.3604  | 6  | 13.85 | Acetylation (N-term);<br>Pro->Hyp |
| 113 | GPXGPXGAGXPQ    | 95 | 1075.4785 | 12 | 12.05 | Pro->Hyp                          |
| 114 | AGGPLGPR        | 95 | 723.4027  | 8  | 10.76 |                                   |
| 115 | GPLFK           | 95 | 560.3322  | 5  | 17.07 |                                   |
| 116 | LXGPPGP         | 99 | 649.3386  | 7  | 21.06 | Pro->Hyp                          |
| 117 | LXGPXGP         | 98 | 665.3286  | 7  | 17.46 | Pro->Hyp                          |
| 118 | LPGPPGP         | 98 | 633.3486  | 7  | 25.26 |                                   |
| 119 | QGGPXGPXGAP     | 98 | 962.4359  | 11 | 12.59 | Pro->Hyp                          |
| 120 | PGLP            | 98 | 382.2216  | 4  | 34.34 |                                   |
| 121 | LXGFXGPK        | 95 | 843.4391  | 8  | 25.04 | Pro->Hyp                          |
| 122 | GPXGAP          | 97 | 510.2389  | 6  | 22.75 | Pro->Hyp                          |
| 123 | D(+42.01)PGPGP  | 96 | 580.2493  | 6  | 15.98 | Acetylation (N-term)              |
| 124 | LXGFT           | 97 | 549.2749  | 5  | 28.43 | Pro->Hyp                          |
| 125 | LXGFQ           | 99 | 576.2858  | 5  | 26.66 | Pro->Hyp                          |
| 126 | GPPVPGP         | 98 | 619.3329  | 7  | 20.35 |                                   |
| 127 | N(+42.01)PGPGP  | 97 | 579.2653  | 6  | 15.98 | Acetylation (N-term)              |
| 128 | GPXGGPXAGP      | 96 | 834.3773  | 10 | 12.69 | Pro->Hyp                          |
| 129 | FXGGPT          | 96 | 590.2651  | 6  | 16.22 | Pro->Hyp                          |
| 130 | K(+42.01)XGPPGP | 96 | 706.36    | 7  | 23.92 | Acetylation (N-term);<br>Pro->Hyp |
| 131 | FXGVR           | 97 | 590.3127  | 5  | 14.64 | Pro->Hyp                          |
| 132 | GPXGLGXGAP      | 97 | 850.4086  | 10 | 18.89 | Pro->Hyp                          |
| 133 | AGPLGPR         | 96 | 666.3813  | 7  | 10.66 |                                   |
| 134 | AAGPXGPGP       | 98 | 735.3502  | 9  | 11.53 | Pro->Hyp                          |
| 135 | GFXGLQ          | 97 | 633.3073  | 6  | 10.66 | Pro->Hyp                          |

|     |                  |    |           |    |       |                                   |
|-----|------------------|----|-----------|----|-------|-----------------------------------|
| 136 | GPXGAGXGPGXPQ    | 96 | 1132.5    | 13 | 12.07 | Pro->Hyp                          |
| 137 | XGGPR            | 99 | 498.2501  | 5  | 12.58 | Pro->Hyp                          |
| 138 | EFXGPR           | 95 | 717.3397  | 6  | 11.79 | Pro->Hyp                          |
| 139 | LPGLP            | 98 | 495.3057  | 5  | 30.24 |                                   |
| 140 | GAGAGPXGPXGAP    | 96 | 1033.4729 | 13 | 13.54 | Pro->Hyp                          |
| 141 | QGGGPXGPXAGP     | 96 | 1019.4573 | 12 | 11.82 | Pro->Hyp                          |
| 142 | FGXLQ            | 96 | 576.2858  | 5  | 28.26 | Pro->Hyp                          |
| 143 | TGFXGPR          | 97 | 746.3662  | 7  | 13.5  | Pro->Hyp                          |
| 144 | A(+42.01)XGPPGAP | 95 | 720.3393  | 8  | 21.53 | Acetylation (N-term);<br>Pro->Hyp |
| 145 | K(+42.01)PGPL    | 96 | 552.3271  | 5  | 33.65 | Acetylation (N-term)              |
| 146 | PVPGMP           | 96 | 596.2992  | 6  | 37.63 |                                   |
| 147 | LXGPLR           | 98 | 667.3968  | 6  | 14.02 | Pro->Hyp                          |
| 148 | GPLGPR           | 98 | 595.3442  | 6  | 9.69  |                                   |
| 149 | GPXGVGPXGAP      | 98 | 933.4457  | 11 | 16.55 | Pro->Hyp                          |
| 150 | GPXGGLXGPQ       | 95 | 907.4301  | 10 | 16.46 | Pro->Hyp                          |
| 151 | GPLGGPR          | 96 | 652.3656  | 7  | 9.83  |                                   |
| 152 | MGPPAP           | 95 | 568.2679  | 6  | 30.61 |                                   |
| 153 | GPXGPYGPQ        | 98 | 884.3979  | 9  | 21.97 | Pro->Hyp                          |
| 154 | LFXGPK           | 98 | 673.3749  | 6  | 14.75 | Pro->Hyp                          |
| 155 | QXGGADGRXGPXGPG  | 95 | 1363.5969 | 15 | 9.43  | Pro->Hyp                          |
| 156 | A(+42.01)GPL     | 96 | 398.2165  | 4  | 27.79 | Acetylation (N-term)              |
| 157 | RGFXGAR          | 96 | 775.404   | 7  | 8.6   | Pro->Hyp                          |
| 158 | LXGGLP           | 95 | 568.3171  | 6  | 26.05 | Pro->Hyp                          |
| 159 | GPXGPXGEKGS GP   | 97 | 1164.5312 | 13 | 8.82  | Pro->Hyp                          |
| 160 | DGP GPPGAP       | 95 | 763.35    | 9  | 22    |                                   |
| 161 | LXGPGLP          | 97 | 665.3699  | 7  | 26.7  | Pro->Hyp                          |
| 162 | ERFXGPR          | 97 | 873.4407  | 7  | 10.49 | Pro->Hyp                          |
| 163 | APDPLR           | 98 | 667.3653  | 6  | 13.27 |                                   |
| 164 | GPXGPXGHSGPQ     | 95 | 1115.4897 | 12 | 8.22  | Pro->Hyp                          |
| 165 | LGPL             | 97 | 398.2529  | 4  | 27.02 |                                   |
| 166 | GPXGGLVGPK       | 95 | 893.4921  | 10 | 14.26 | Pro->Hyp                          |
| 167 | FALR             | 97 | 505.3012  | 4  | 18.04 |                                   |
| 168 | FGLXGAP          | 95 | 673.3386  | 7  | 34.49 | Pro->Hyp                          |
| 169 | LXGGPXGAP        | 95 | 793.3871  | 9  | 16.72 | Pro->Hyp                          |
| 170 | XGGLR            | 96 | 514.2814  | 5  | 13.05 | Pro->Hyp                          |
| 171 | NAGPXGPXGAP      | 98 | 962.4359  | 11 | 13.1  | Pro->Hyp                          |
| 172 | GAXGQDGRXGPXGPG  | 95 | 1363.5969 | 15 | 9.43  | Pro->Hyp                          |
| 173 | H(+42.01)PDPLR   | 95 | 775.3976  | 6  | 16.51 | Acetylation (N-term)              |
| 174 | XGLR             | 95 | 457.2599  | 4  | 15.44 | Pro->Hyp                          |
| 175 | ALXGPPGAP        | 97 | 791.4128  | 9  | 22.95 | Pro->Hyp                          |
| 176 | ALXGPXGAP        | 96 | 807.4028  | 9  | 18.68 | Pro->Hyp                          |
| 177 | K(+42.01)XGPXGPA | 95 | 793.3871  | 8  | 19.87 | Acetylation (N-term);<br>Pro->Hyp |
| 178 | GLPGPPGAP        | 97 | 761.4072  | 9  | 28.06 |                                   |
| 179 | GLXGPXGAP        | 95 | 793.3871  | 9  | 18.82 | Pro->Hyp                          |
| 180 | SXGGSFGPA        | 97 | 791.34    | 9  | 20.09 | Pro->Hyp                          |

|     |                    |    |           |    |       |                          |
|-----|--------------------|----|-----------|----|-------|--------------------------|
| 181 | GPALGXGPA          | 95 | 751.3815  | 9  | 17.24 | Pro->Hyp                 |
| 182 | AFGPXGGAP          | 96 | 785.3658  | 9  | 19.94 | Pro->Hyp                 |
| 183 | GPXGGRVGPXGAP      | 98 | 1146.5684 | 13 | 12.39 | Pro->Hyp                 |
| 184 | LXGLR              | 99 | 570.344   | 5  | 14.85 | Pro->Hyp                 |
| 185 | LXGGLR             | 97 | 627.3655  | 6  | 13.37 | Pro->Hyp                 |
| 186 | VAXGPPGP           | 95 | 706.36    | 8  | 23.38 | Pro->Hyp                 |
| 187 | AXGLXGPQ           | 95 | 767.3715  | 8  | 15.37 | Pro->Hyp                 |
| 188 | AXGPVLR            | 98 | 724.4182  | 7  | 12.11 | Pro->Hyp                 |
| 189 | LXGAP              | 97 | 469.2487  | 5  | 12.05 | Pro->Hyp                 |
| 190 | AXGGADGRXGPXGGP    | 95 | 1306.5754 | 15 | 8.95  | Pro->Hyp                 |
| 191 | A(+42.01)GPR       | 97 | 441.2336  | 4  | 12.17 | Acetylation (N-term)     |
| 192 | APGVPGP            | 96 | 593.3173  | 7  | 16.08 |                          |
| 193 | VXGPGP             | 98 | 538.2701  | 6  | 11.31 | Pro->Hyp                 |
| 194 | K(+42.01)GPVF      | 96 | 588.3271  | 5  | 37.61 | Acetylation (N-term)     |
| 195 | AXGVGPXGAP         | 98 | 850.4086  | 10 | 14.36 | Pro->Hyp                 |
| 196 | NFXGGAP            | 95 | 674.2974  | 7  | 19.38 | Pro->Hyp                 |
| 197 | LXGPPGAP           | 99 | 720.3757  | 8  | 20.73 | Pro->Hyp                 |
| 198 | LPGPPGAP           | 99 | 704.3857  | 8  | 24.92 |                          |
| 199 | LXGPXGAP           | 98 | 736.3657  | 8  | 17.14 | Pro->Hyp                 |
| 200 | LXGPLK             | 99 | 639.3906  | 6  | 13.43 | Pro->Hyp                 |
| 201 | LPGPLK             | 98 | 623.4006  | 6  | 16.33 |                          |
| 202 | LAGPL              | 96 | 469.29    | 5  | 23.37 |                          |
| 203 | FTGLR              | 97 | 592.3333  | 5  | 15.39 |                          |
| 204 | LXGAL              | 98 | 485.28    | 5  | 21.27 | Pro->Hyp                 |
| 205 | AGK(+43.01)XGPXGAP | 96 | 922.4451  | 10 | 20.54 | Carbamoylation; Pro->Hyp |
| 206 | QXGQDGRPGPXGGP     | 98 | 1347.6069 | 14 | 11.65 | Pro->Hyp                 |
| 207 | PVPGP              | 95 | 465.2587  | 5  | 28.64 |                          |
| 208 | RGFXGGAR           | 96 | 832.4254  | 8  | 8.1   | Pro->Hyp                 |
| 209 | FSGLD              | 98 | 537.2435  | 5  | 23.74 |                          |
| 210 | LXGAGP             | 97 | 526.2701  | 6  | 10.69 | Pro->Hyp                 |
| 211 | GPLGXGAP           | 97 | 680.3444  | 8  | 19.63 | Pro->Hyp                 |
| 212 | SPGPDGKAGPA        | 95 | 952.4614  | 11 | 8.74  |                          |
| 213 | AXGQDGRXGPXGGP     | 99 | 1306.5754 | 14 | 9.46  | Pro->Hyp                 |
| 214 | LXGLXGAP           | 95 | 752.397   | 8  | 31.1  | Pro->Hyp                 |
| 215 | GPXGRVGPXGAP       | 98 | 1089.5469 | 12 | 12.46 | Pro->Hyp                 |
| 216 | GLPGXGPPA          | 96 | 777.3972  | 9  | 23.46 | Pro->Hyp                 |
| 217 | VXGPGXGAP          | 97 | 779.3715  | 9  | 13.11 | Pro->Hyp                 |
| 218 | LLGPXG             | 95 | 568.3171  | 6  | 15.9  | Pro->Hyp                 |
| 219 | QPGVPGP            | 95 | 650.3387  | 7  | 16.67 |                          |
| 220 | GNPGPDGKLGPS       | 95 | 1094.5356 | 12 | 14.03 |                          |
| 221 | VGPVF              | 98 | 517.29    | 5  | 35.8  |                          |
| 222 | FXGVQ              | 98 | 562.2702  | 5  | 20.93 | Pro->Hyp                 |
| 223 | VPGLP              | 97 | 481.29    | 5  | 22.83 |                          |
| 224 | GPXGGYSGVP         | 97 | 902.4084  | 10 | 23.43 | Pro->Hyp                 |
| 225 | LGLGPXG            | 95 | 625.3386  | 7  | 21.6  | Pro->Hyp                 |
| 226 | XGGAR              | 98 | 472.2344  | 5  | 8.21  | Pro->Hyp                 |
| 227 | FGLGXGAP           | 95 | 730.36    | 8  | 31.11 | Pro->Hyp                 |

|     |                   |    |           |    |       |                                   |
|-----|-------------------|----|-----------|----|-------|-----------------------------------|
| 228 | APGPVGAP          | 98 | 664.3544  | 8  | 15.98 |                                   |
| 229 | LXGPQ             | 96 | 526.2701  | 5  | 11.02 | Pro->Hyp                          |
| 230 | LGXGAL            | 95 | 542.3015  | 6  | 25.6  | Pro->Hyp                          |
| 231 | VGPXGAP           | 98 | 609.3073  | 7  | 11.65 | Pro->Hyp                          |
| 232 | VGPXGPA           | 96 | 609.3073  | 7  | 12.16 | Pro->Hyp                          |
| 233 | SXGPDGKAGAP       | 99 | 968.4514  | 11 | 7.84  | Pro->Hyp                          |
| 234 | FVGXGAP           | 95 | 659.3229  | 7  | 28.23 | Pro->Hyp                          |
| 235 | GGFDLGAK          | 96 | 763.3864  | 8  | 23.17 |                                   |
| 236 | K(+42.01)XGLR     | 96 | 627.3655  | 5  | 18.76 | Acetylation (N-term);<br>Pro->Hyp |
| 237 | LXGPLQ            | 97 | 639.3542  | 6  | 22.38 | Pro->Hyp                          |
| 238 | NXGPDGKLGSP       | 97 | 1053.5042 | 11 | 11.75 | Pro->Hyp                          |
| 239 | GPLLK             | 99 | 526.3478  | 5  | 11.56 |                                   |
| 240 | AXGGLVGP          | 97 | 810.455   | 9  | 12.57 | Pro->Hyp                          |
| 241 | NAXGQDGRXGPXGGP   | 98 | 1420.6184 | 15 | 10.14 | Pro->Hyp                          |
| 242 | NPGPDGKLGPS       | 96 | 1037.5142 | 11 | 14.06 |                                   |
| 243 | GPLGGAP           | 95 | 567.3016  | 7  | 14.83 |                                   |
| 244 | AVGPXGAP          | 98 | 680.3444  | 8  | 12.93 | Pro->Hyp                          |
| 245 | APGVPGAP          | 98 | 664.3544  | 8  | 15.59 |                                   |
| 246 | AXGVPGAP          | 97 | 680.3444  | 8  | 13.47 | Pro->Hyp                          |
| 247 | K(+42.01)AGPL     | 95 | 526.3115  | 5  | 29.39 | Acetylation (N-term)              |
| 248 | NXGPDGKLGSP       | 99 | 1053.5042 | 11 | 12.26 | Pro->Hyp                          |
| 249 | LVGPXGP           | 99 | 651.3542  | 7  | 18.35 | Pro->Hyp                          |
| 250 | FXGGKTGAYNPXGAP   | 95 | 1461.679  | 15 | 11.26 | Pro->Hyp                          |
| 251 | LXGLA             | 95 | 485.28    | 5  | 23.77 | Pro->Hyp                          |
| 252 | K(+42.01)VGPXGP   | 97 | 708.3757  | 7  | 23.71 | Acetylation (N-term);<br>Pro->Hyp |
| 253 | QVGPVF            | 95 | 645.3486  | 6  | 39.05 |                                   |
| 254 | A(+42.01)AVGPXGAP | 95 | 793.392   | 9  | 22.56 | Acetylation (N-term);<br>Pro->Hyp |
| 255 | AGLGXGAP          | 96 | 654.3287  | 8  | 16    | Pro->Hyp                          |
| 256 | QXGGQDGRSGPXGSP   | 97 | 1424.6182 | 15 | 8.32  | Pro->Hyp                          |
| 257 | RVGPXGP           | 98 | 694.3713  | 7  | 10.55 | Pro->Hyp                          |
| 258 | LXGGVP            | 97 | 554.3015  | 6  | 17.99 | Pro->Hyp                          |
| 259 | LGLR              | 96 | 457.3012  | 4  | 12.56 |                                   |
| 260 | LAVGPXGAP         | 96 | 793.4285  | 9  | 22.27 | Pro->Hyp                          |
| 261 | FGXGVQ            | 96 | 619.2916  | 6  | 23.83 | Pro->Hyp                          |
| 262 | GPLGGVP           | 96 | 595.3329  | 7  | 23.22 |                                   |
| 263 | GPDGYSGPV         | 97 | 847.3712  | 9  | 23.75 |                                   |
| 264 | K(+42.01)GPVM     | 95 | 572.2992  | 5  | 24.93 | Acetylation (N-term)              |
| 265 | LLGPGXGAP         | 99 | 793.4285  | 9  | 23.32 | Pro->Hyp                          |
| 266 | LXGLQ             | 97 | 542.3015  | 5  | 20.22 | Pro->Hyp                          |
| 267 | NGFDLGAK          | 96 | 820.4079  | 8  | 22.75 |                                   |
| 268 | AXGGYSGVP         | 96 | 819.3713  | 9  | 21.66 | Pro->Hyp                          |
| 269 | LVGPXGAP          | 98 | 722.3914  | 8  | 18.36 | Pro->Hyp                          |
| 270 | LXGGLQ            | 95 | 599.3229  | 6  | 18.38 | Pro->Hyp                          |
| 271 | LAGLR             | 95 | 528.3384  | 5  | 13.24 |                                   |

|     |                         |    |           |    |       |                      |
|-----|-------------------------|----|-----------|----|-------|----------------------|
| 272 | LLGXGPGSP               | 96 | 809.4233  | 9  | 20.3  | Pro->Hyp             |
| 273 | FSGLDGAK                | 98 | 793.397   | 8  | 17.24 |                      |
| 274 | LGXLAGPT                | 95 | 740.4019  | 8  | 27.13 | Pro->Hyp             |
| 275 | K(+42.01)GPVGP          | 96 | 595.3329  | 6  | 19.79 | Acetylation (N-term) |
| 276 | LVGFQ                   | 98 | 562.3115  | 5  | 29.12 |                      |
| 277 | K(+42.01)GPVL           | 95 | 554.3428  | 5  | 31.73 | Acetylation (N-term) |
| 278 | VGPVGP                  | 95 | 524.2958  | 6  | 17.7  |                      |
| 279 | LVGGLR                  | 95 | 613.3911  | 6  | 13.73 |                      |
| 280 | TENN(+.98)KN(+.98)FWLVK | 98 | 1393.6877 | 11 | 38.95 | Deamidation (NQ)     |
| 281 | YSGPV                   | 97 | 521.2485  | 5  | 16.65 |                      |
| 282 | GLVGPK                  | 96 | 569.3537  | 6  | 11.05 |                      |
| 283 | RXGERGPXGPQ             | 95 | 1178.5693 | 11 | 7.34  | Pro->Hyp             |
| 284 | LALR                    | 99 | 471.3169  | 4  | 11.68 |                      |
| 285 | ALVGPK                  | 97 | 583.3693  | 6  | 10.84 |                      |
| 286 | NYSGVP                  | 96 | 635.2914  | 6  | 19.8  |                      |
| 287 | LVGPK                   | 99 | 512.3322  | 5  | 8.47  |                      |
| 288 | LLVGPK                  | 96 | 625.4163  | 6  | 17.96 |                      |
| 289 | VGPVGSP                 | 98 | 611.3278  | 7  | 14.87 |                      |
| 290 | AVLVGPK                 | 95 | 682.4377  | 7  | 14.69 |                      |
| 291 | QVGPVGSP                | 95 | 739.3864  | 8  | 17.94 |                      |
| 292 | LTLR                    | 96 | 501.3275  | 4  | 13    |                      |

X: Hyp

**Table S2 The analysis certificate of gelatin supplied by Shanghai Xinxi Biotechnology Co.**

| Test                             | Specification                | Test result              | Test Method                |
|----------------------------------|------------------------------|--------------------------|----------------------------|
| <b>Physicochemical parameter</b> |                              |                          |                            |
| Transparency (10% solution)      | ≤25 NTU                      | ≤21.31 NTU               | Ref.TCVN 6184:2008         |
| Appearance                       | Yellow to amber color powder | Yellow powder            | Visual                     |
| Foreign material                 | Not detected                 | Not detected             | Mental detector            |
| pH value of 1% solution          | 5.0-7.0                      | 5.42                     | USP                        |
| Gel strength (Bloom) 6.67%       | 250±15                       | 243.1 g                  | USP                        |
| Viscosity (6.67%, 60℃)           | ≥ 30 mps<br>(≥ 3.0 mPa.s)    | 35.6 mps<br>(3.56 mPa.s) | GMIA                       |
| Moisture content                 | ≤12%                         | 9.31%                    | USP                        |
| (Residue on ignition)            | ≤2%                          | 0.27%                    | AOAC                       |
| Total ash content                |                              |                          |                            |
| Protein content                  | ≥ 85%                        | 89.2%                    | FAO                        |
| Particle size                    | ≥ 95% through 8 mesh size    | 95.37% through 8 mesh    |                            |
| Sulfit*                          | <3mg/kg                      | Pass                     | AOAC                       |
| Melamine                         | <2.5 ppm                     | Not detected             | QQQ-LC/MS/MS-Ref FDA (USA) |
| <b>Heavy metal</b>               |                              |                          |                            |
| Pb*                              | ≤ 1.0 ppm                    | Pass                     | AOAC                       |
| As*                              | ≤ 1.0 ppm                    | Pass                     | AOAC                       |

|                                       |              |              |               |
|---------------------------------------|--------------|--------------|---------------|
| Cr <sup>*</sup>                       | ≤ 10 ppm     | Pass         | AOAC          |
| <b>Microbiological parameter</b>      |              |              |               |
| <i>Total Plate Count</i>              | ≤ 1000 cfu/g | <10 cfu/g    | USP           |
| <i>Total yeast and mould</i>          | <100 cfu/g   | <10 cfu/g    | USP           |
| <i>Escherichia Coli</i>               | Not detected | Not detected | USP           |
| <i>Coliforms</i>                      | Not detected | Not detected | ISO 4831:2006 |
| <i>Salmonella</i>                     | Negative/25g | Negative/25g | USP           |
| <b>Hydroxyproline content</b>         |              |              |               |
| <b>7.258 ± 0.089%<sup>&amp;</sup></b> |              |              |               |

<sup>\*</sup>Performed on routine level, as per quality control plan.

<sup>&</sup> It was conducted using the alkali hydrolysis method with a commercially available kit (Jiangsu Kaiji Biotechnology Co. Nanjing, China)
